# Supplementary material for: New catalyst systems for iron-catalyzed hydrosilane reduction of carboxamides
Source: Royal Society of Chemistry journal article supplement (doi:10.1039/c1cc10636h), 2011-01-01
Supplement: c1cc10636h.pdf [file c1cc10636h.pdf]

## Supporting Information for

# New Catalyst Systems for Iron-catalyzed Hydrosilane Reduction of Carboxamides

Hironori Tsutsumi,<sup>a</sup> Yusuke Sunada<sup>a,b</sup> and Hideo Nagashima<sup>\*a,b</sup>

<sup>a</sup> Graduate School of Engineering Sciences, Kyushu University, 6-1 Kasugakoen, Kasuga, Fukuoka, 816-8580, Japan

<sup>b</sup> Institute for Materials Chemistry and Engineering, Kyushu University, 6-1 Kasugakoen, Kasuga, Fukuoka, 816-8580, Japan

### Contents

|                                                                                                                |     |
|----------------------------------------------------------------------------------------------------------------|-----|
| <b>S-1. General Information</b>                                                                                | S2  |
| <b>S-2. Synthesis of <math>[\text{Fe}_3(\text{H})(\text{CO})_{11}]_2\{\text{Fe}(\text{DMF})_4\}</math> (4)</b> | S2  |
| <b>S-3. General Procedure for the Reduction of Carboxamides:</b>                                               | S2  |
| <b>S-3-1. Reduction of carboxamides with BDSB catalyzed by 4 (0.5 mol% for Fe).</b>                            | S2  |
| <b>S-3-2. A Procedure for Gram-Scale Production of Amine 2a.</b>                                               | S3  |
| <b>S-4. X-ray data collection and reduction</b>                                                                | S3  |
| <b>S-5. Spectral data of obtained amines</b>                                                                   | S11 |
| <b>S-6. Copies of the actual NMR spectrum</b>                                                                  | S13 |
| <b>S-7. References</b>                                                                                         | S18 |

### S-1. General Information

Manipulation of air and moisture sensitive organometallic compounds was carried out under a dry argon atmosphere using standard Schlenk tube techniques associated with a high-vacuum line or in the glove box under dry nitrogen atmosphere. All solvents were distilled over  $\text{Ph}_2\text{CO}/\text{Na}$  prior to use.  $^1\text{H}$ ,  $^{13}\text{C}$ ,  $^{29}\text{Si}$ ,  $^{195}\text{Pt}$  NMR spectra were recorded on a JEOL Lambda 600 or a Lambda 400 spectrometer at ambient temperature unless otherwise noted.  $^1\text{H}$ ,  $^{13}\text{C}$  NMR chemical shifts ( $\delta$  values) were given in ppm relative to the solvent signal ( $^1\text{H}$ ,  $^{13}\text{C}$ ). Elemental analyses were performed by a Perkin Elmer 2400II/CHN analyzer. IR spectra were recorded on a JASCO FT/IR-550 spectrometer. Analytical thin-layer chromatography (TLC) was performed on glass plates and aluminum sheets precoated with silica gel (Merck, Kieselgel 60 F<sub>254</sub>, layer thickness 0.25 and 0.2 mm, respectively). Visualization was accomplished by UV light (254 nm), anisaldehyde, and phosphomolybdic acid. 1,2-bis(dimethylsilyl)benzene<sup>1</sup>,  $(\text{Me}_2\text{SiC}_6\text{H}_4\text{SiMe}_2)\text{Fe}(\text{CO})_4$  (**2**)<sup>2</sup>, and all carboxamides<sup>3</sup> were synthesized by the method reported in the literature.

### S-2. Synthesis of $[\text{Fe}_3(\text{H})(\text{CO})_{11}]_2\{\text{Fe}(\text{DMF})_4\}$ (**4**).

In a glove box,  $\text{Fe}(\text{CO})_5$  (1050  $\mu\text{L}$ , 8 mmol) was dissolved in toluene (4 mL), and dimethylformamide (6.4 mL, 80 mmol) was added to this solution at room temperature. The resulting mixture was stirred at 65 °C for 4 days during which time the color of the solution changed from yellow to red-violet. The solvent was removed under vacuum, and the residue was washed with cold ether (3 mL x 2) and pentane (5 mL) to afford **4** as red-violet powder (720 mg, 48 %). Single crystals suitable for X-ray diffraction analysis were obtained by recrystallization from ether/pentane as dark red-violet crystals. For brief summary of X-ray crystallographic analysis, see S-4. UV (dioxane):  $\lambda_{\text{max}} = 499$  nm,  $\epsilon = 4960$  L·mol<sup>-1</sup>·cm<sup>-1</sup>; IR (KBr):  $\nu_{\text{C=O}} = 2070\text{-}1950$  cm<sup>-1</sup>,  $\nu_{\text{C-O}} = 1592$  cm<sup>-1</sup>,  $\nu_{\text{C-O}} = 1654$  cm<sup>-1</sup>; Anal calcd for  $\text{C}_{34}\text{H}_{30}\text{Fe}_7\text{N}_4\text{O}_{26}$  C 31.38, H 2.32, N 4.30; found: C 31.91, H 1.97, N 4.52.

### S-3. General Procedure for the Reduction of Carboxamides:

#### S-3-1. Reduction of carboxamides with BDSB catalyzed by **4** (0.5 mol% for Fe).

In a 20 mL Schlenk tube, **4** (0.9 mg,  $6.9 \times 10^{-4}$  mmol, 0.5 mol% for Fe) was dissolved in the mixture of toluene (0.5 mL) and carboxamide **1** (1 mmol), and 1,2-bis(dimethylsilyl)benzene (BDSB: 475  $\mu\text{L}$ , 2.2 mmol) was added to this solution. The solution was stirred at 100 °C for 0.5 - 3 h. After complete consumption of **1** was confirmed by TLC analysis, the reaction mixture was passed through a Florisil<sup>®</sup> column with Celite putting on the head. After removal of the solvent, purification of the residue by alumina column chromatography gave the amine **2**.

#### S-3-2. A Procedure for Gram-Scale Production of Amine **2a**.

In a 20 mL Schlenk tube, **4** (9.3 mg,  $6.9 \times 10^{-3}$  mmol, 0.5 mol% for Fe) was dissolved in the mixture of toluene (5 mL) and **1a** (1.79g, 10 mmol), and 1,2-bis(dimethylsilyl)benzene (BDSB: 4750  $\mu\text{L}$ , 2.2 mmol) was added to this solution. This solution was heated at 100 °C for 50 min, then the resultant mixture was diluted

with Et<sub>2</sub>O (20 mL). The solution was washed with HCl (1M, 20 mL), and the aqueous layers were treated with NaOH aq. The mixture was extracted two times with ether (30 mL in total). The combined extracts were dried over MgSO<sub>4</sub>, and dried to afford the corresponding amine **2a** in 95 % yield (1.57 g, 9.5 mmol). ICP-mass analysis of this product revealed that the extracted amine contained approximately 0.7 ppm of iron species. In other words, over 99.6 % of the charged iron species was removed by this simple purification procedure.

#### S-4. X-ray data collection and reduction

Single crystals of **4** were grown from ether/pentane. X-ray crystallography was performed on a Rigaku Saturn CCD area detector with graphite monochromated Mo-K $\alpha$  radiation ( $\lambda = 0.71070\text{\AA}$ ). The data were collected at 123(2) K using  $\omega$  scan in the  $\theta$  range of  $3.0 \leq \theta \leq 27.5$  deg. The data obtained were processed using Crystal-Clear (Rigaku) on a Pentium computer, and were corrected for Lorentz and polarization effects. The structure was solved by direct methods<sup>4</sup>, and expanded using Fourier techniques.<sup>5</sup> The non-hydrogen atoms were refined anisotropically. Hydrogen atoms were refined using the riding model except for the hydride atoms. The hydride atom in **4** was detected from the Fourier map, and refined isotropically. The final cycle of full-matrix least-squares refinement on  $F^2$  was based on 5,478 observed reflections and 340 variable parameters for **4**. Neutral atom scattering factors were taken from Cromer and Waber.<sup>6</sup> All calculations were performed using the CrystalStructure<sup>7,8</sup> crystallographic software package. Details of final refinement as well as the bond distances and angles are summarized in the table shown below, and the numbering scheme employed is also shown below, which was drawn with ORTEP at 50% probability ellipsoid.

S-4-1. ORTEP drawing of **4** with 50 % probability ellipsoid.

**Table S4-1.** Crystal data and structure refinement for **4**

|                                                   |                                                                                                                                |
|---------------------------------------------------|--------------------------------------------------------------------------------------------------------------------------------|
| Empirical Formula                                 | C <sub>34</sub> H <sub>30</sub> Fe <sub>7</sub> N <sub>4</sub> O <sub>26</sub>                                                 |
| Formula Weight                                    | 1301.55                                                                                                                        |
| Crystal Color, Habit                              | purple red, block                                                                                                              |
| Temperature                                       | -160.0 °C                                                                                                                      |
| Radiation                                         | MoK $\alpha$ ( $\lambda$ = 0.71070 Å)<br>graphite monochromated                                                                |
| Crystal System                                    | triclinic                                                                                                                      |
| Space Group                                       | P-1 (#2)                                                                                                                       |
| Lattice Parameters                                | a = 9.979(5) Å<br>b = 11.850(3) Å<br>c = 11.906(5) Å<br>$\alpha$ = 76.2(2) °<br>$\beta$ = 73.60(12) °<br>$\gamma$ = 66.89(8) ° |
| Volume                                            | 1229.2(13) Å <sup>3</sup>                                                                                                      |
| Z value                                           | 1                                                                                                                              |
| D <sub>calc</sub>                                 | 1.758 g/cm <sup>3</sup>                                                                                                        |
| F <sub>000</sub>                                  | 652.00                                                                                                                         |
| Crystal Dimensions                                | 0.100 X 0.100 X 0.080 mm                                                                                                       |
| Theta range for data collection                   | 3.2 to 27.5 °                                                                                                                  |
| No. Observations (All reflections)                | 5478                                                                                                                           |
| No. Variables                                     | 340                                                                                                                            |
| Refinement                                        | Full-matrix least-squares on F <sup>2</sup>                                                                                    |
| Goodness of fit on F <sup>2</sup>                 | 1.002                                                                                                                          |
| Residuals: R <sub>1</sub> (I > 2.00 $\sigma$ (I)) | R <sub>1</sub> = 0.0247                                                                                                        |
| Residuals: R (All reflections)                    | R = 0.0255                                                                                                                     |
| R indices (All data)                              | wR <sub>2</sub> = 0.0989                                                                                                       |
| Largest diff. peak and hole                       | 0.92 e/Å <sup>3</sup> and -0.42 e/Å <sup>3</sup>                                                                               |

**Table S4-2.** Atomic coordinates and  $B_{\text{iso}}/B_{\text{eq}}$  and occupancy

| atom | x           | y           | z           | $B_{\text{eq}}$ | occ |
|------|-------------|-------------|-------------|-----------------|-----|
| Fe1  | 0.5000      | 1.0000      | 0.0000      | 1.224(6)        | 1/2 |
| Fe2  | 0.59425(2)  | 0.81770(2)  | 0.39791(2)  | 1.383(6)        | 1   |
| Fe3  | 0.63645(2)  | 0.63533(2)  | 0.29237(2)  | 1.467(6)        | 1   |
| Fe4  | 0.87379(2)  | 0.68252(2)  | 0.30672(2)  | 1.477(6)        | 1   |
| O1   | 0.55747(12) | 0.88217(11) | 0.15463(9)  | 2.25(3)         | 1   |
| O2   | 0.67425(13) | 1.03943(10) | 0.30166(11) | 2.44(3)         | 1   |
| O3   | 0.27295(13) | 0.95051(12) | 0.44755(11) | 2.78(3)         | 1   |
| O4   | 0.6488(2)   | 0.7678(2)   | 0.64010(11) | 3.57(3)         | 1   |
| O5   | 0.8101(2)   | 0.57588(13) | 0.05833(11) | 3.35(3)         | 1   |
| O6   | 0.3511(2)   | 0.6620(2)   | 0.24882(13) | 3.58(3)         | 1   |
| O7   | 0.6878(2)   | 0.37841(11) | 0.41905(12) | 3.11(3)         | 1   |
| O8   | 0.8830(2)   | 0.86234(13) | 0.08674(11) | 3.21(3)         | 1   |
| O9   | 1.15016(13) | 0.50075(11) | 0.19714(11) | 2.69(3)         | 1   |
| O10  | 1.0068(2)   | 0.78739(12) | 0.42726(13) | 3.20(3)         | 1   |
| O11  | 0.8305(2)   | 0.51114(11) | 0.52555(10) | 2.60(3)         | 1   |
| O12  | 0.60035(12) | 1.11775(10) | 0.01690(9)  | 1.85(2)         | 1   |
| O13  | 0.30241(11) | 1.10657(9)  | 0.10222(9)  | 1.72(2)         | 1   |
| N1   | 0.6194(2)   | 1.27594(12) | 0.07715(12) | 2.05(3)         | 1   |
| N2   | 0.0829(2)   | 1.13871(11) | 0.23425(11) | 1.82(3)         | 1   |
| C1   | 0.5884(2)   | 0.80959(13) | 0.24093(12) | 1.48(3)         | 1   |
| C2   | 0.6453(2)   | 0.9514(2)   | 0.34268(13) | 1.84(3)         | 1   |
| C3   | 0.3993(2)   | 0.8975(2)   | 0.43129(12) | 1.89(3)         | 1   |
| C4   | 0.6281(2)   | 0.7830(2)   | 0.54788(13) | 2.19(3)         | 1   |
| C5   | 0.7449(2)   | 0.5994(2)   | 0.1508(2)   | 2.17(3)         | 1   |
| C6   | 0.4619(2)   | 0.6503(2)   | 0.2677(2)   | 2.23(3)         | 1   |
| C7   | 0.6716(2)   | 0.4781(2)   | 0.3741(2)   | 2.13(3)         | 1   |
| C8   | 0.8725(2)   | 0.7942(2)   | 0.1720(2)   | 2.10(3)         | 1   |
| C9   | 1.0400(2)   | 0.5689(2)   | 0.24000(13) | 1.97(3)         | 1   |
| C10  | 0.9547(2)   | 0.74876(13) | 0.3790(2)   | 2.05(3)         | 1   |
| C11  | 0.8371(2)   | 0.5781(2)   | 0.4383(2)   | 1.99(3)         | 1   |
| C12  | 0.5431(2)   | 1.2108(2)   | 0.06758(13) | 1.82(3)         | 1   |
| C13  | 0.7784(2)   | 1.2392(2)   | 0.0291(2)   | 3.07(4)         | 1   |
| C14  | 0.5501(3)   | 1.3810(2)   | 0.1422(3)   | 4.01(5)         | 1   |
| C15  | 0.2062(2)   | 1.06837(13) | 0.17193(13) | 1.83(3)         | 1   |
| C16  | 0.0531(2)   | 1.2698(2)   | 0.2260(2)   | 3.03(4)         | 1   |
| C17  | -0.0220(2)  | 1.0885(2)   | 0.3217(2)   | 3.15(4)         | 1   |

$$B_{\text{eq}} = 8/3 \pi^2 (U_{11}(\text{aa}^*)^2 + U_{22}(\text{bb}^*)^2 + U_{33}(\text{cc}^*)^2 + 2U_{12}(\text{aa}^*\text{bb}^*)\cos \gamma + 2U_{13}(\text{aa}^*\text{cc}^*)\cos \beta + 2U_{23}(\text{bb}^*\text{cc}^*)\cos \alpha)$$

**Table S4-3.** Atomic coordinates and  $B_{\text{iso}}$  involving hydrogen atoms

| atom | x        | y        | z        | $B_{\text{iso}}$ | occ |
|------|----------|----------|----------|------------------|-----|
| H1   | 0.575(3) | 0.684(2) | 0.424(2) | 2.6(4)           | 1   |

**Table S4-4.** Anisotropic displacement parameters

| atom | U <sub>11</sub> | U <sub>22</sub> | U <sub>33</sub> | U <sub>12</sub> | U <sub>13</sub> | U <sub>23</sub> |
|------|-----------------|-----------------|-----------------|-----------------|-----------------|-----------------|
| Fe1  | 0.0172(2)       | 0.0148(2)       | 0.0140(2)       | -0.00444(11)    | -0.00343(11)    | -0.00284(11)    |
| Fe2  | 0.01606(13)     | 0.01801(13)     | 0.01697(13)     | -0.00374(9)     | -0.00405(9)     | -0.00297(9)     |
| Fe3  | 0.01809(13)     | 0.0206(2)       | 0.01779(13)     | -0.00778(10)    | -0.00242(9)     | -0.00398(9)     |
| Fe4  | 0.01528(13)     | 0.01810(13)     | 0.02108(13)     | -0.00431(9)     | -0.00466(9)     | -0.00150(9)     |
| O1   | 0.0256(6)       | 0.0352(6)       | 0.0213(5)       | -0.0105(5)      | -0.0098(5)      | 0.0078(5)       |
| O2   | 0.0317(6)       | 0.0260(6)       | 0.0379(6)       | -0.0128(5)      | -0.0063(5)      | -0.0065(5)      |
| O3   | 0.0187(6)       | 0.0434(7)       | 0.0362(7)       | -0.0034(5)      | -0.0036(5)      | -0.0082(6)      |
| O4   | 0.0487(8)       | 0.0524(8)       | 0.0271(6)       | -0.0012(7)      | -0.0170(6)      | -0.0104(6)      |
| O5   | 0.0493(8)       | 0.0502(8)       | 0.0272(6)       | -0.0183(7)      | 0.0040(6)       | -0.0172(6)      |
| O6   | 0.0307(7)       | 0.0582(9)       | 0.0571(9)       | -0.0213(7)      | -0.0161(6)      | -0.0084(7)      |
| O7   | 0.0433(8)       | 0.0247(6)       | 0.0465(8)       | -0.0157(6)      | -0.0047(6)      | 0.0019(6)       |
| O8   | 0.0254(6)       | 0.0475(7)       | 0.0359(7)       | -0.0112(6)      | -0.0060(5)      | 0.0147(6)       |
| O9   | 0.0262(6)       | 0.0296(6)       | 0.0410(7)       | -0.0030(5)      | -0.0013(5)      | -0.0138(5)      |
| O10  | 0.0477(8)       | 0.0303(7)       | 0.0534(8)       | -0.0125(6)      | -0.0258(7)      | -0.0077(6)      |
| O11  | 0.0294(6)       | 0.0317(6)       | 0.0333(6)       | -0.0103(5)      | -0.0138(5)      | 0.0114(5)       |
| O12  | 0.0245(6)       | 0.0241(5)       | 0.0255(5)       | -0.0108(5)      | -0.0040(4)      | -0.0078(5)      |
| O13  | 0.0184(5)       | 0.0210(5)       | 0.0231(5)       | -0.0052(4)      | 0.0002(4)       | -0.0062(4)      |
| N1   | 0.0244(7)       | 0.0277(7)       | 0.0297(7)       | -0.0127(6)      | -0.0024(5)      | -0.0088(6)      |
| N2   | 0.0197(6)       | 0.0244(6)       | 0.0236(6)       | -0.0095(5)      | 0.0001(5)       | -0.0034(5)      |
| C1   | 0.0152(6)       | 0.0224(7)       | 0.0176(6)       | -0.0061(5)      | -0.0025(5)      | -0.0027(5)      |
| C2   | 0.0189(7)       | 0.0250(7)       | 0.0262(7)       | -0.0039(6)      | -0.0069(6)      | -0.0081(6)      |
| C3   | 0.0236(7)       | 0.0267(7)       | 0.0205(7)       | -0.0079(6)      | -0.0036(6)      | -0.0042(6)      |
| C4   | 0.0259(8)       | 0.0285(8)       | 0.0245(7)       | -0.0019(6)      | -0.0080(6)      | -0.0060(6)      |
| C5   | 0.0285(8)       | 0.0291(8)       | 0.0259(8)       | -0.0109(7)      | -0.0035(6)      | -0.0073(6)      |
| C6   | 0.0292(8)       | 0.0296(8)       | 0.0286(8)       | -0.0123(7)      | -0.0053(6)      | -0.0065(6)      |
| C7   | 0.0233(7)       | 0.0283(8)       | 0.0290(8)       | -0.0093(6)      | -0.0006(6)      | -0.0091(7)      |
| C8   | 0.0147(7)       | 0.0309(8)       | 0.0295(8)       | -0.0042(6)      | -0.0043(6)      | -0.0025(6)      |
| C9   | 0.0248(8)       | 0.0234(7)       | 0.0287(8)       | -0.0098(6)      | -0.0065(6)      | -0.0040(6)      |
| C10  | 0.0249(7)       | 0.0190(7)       | 0.0321(8)       | -0.0038(6)      | -0.0100(6)      | -0.0020(6)      |
| C11  | 0.0182(7)       | 0.0235(7)       | 0.0322(8)       | -0.0043(6)      | -0.0076(6)      | -0.0036(6)      |
| C12  | 0.0212(7)       | 0.0251(7)       | 0.0242(7)       | -0.0100(6)      | -0.0034(6)      | -0.0045(6)      |
| C13  | 0.0247(8)       | 0.0497(11)      | 0.0494(11)      | -0.0201(8)      | -0.0013(8)      | -0.0159(9)      |
| C14  | 0.0451(12)      | 0.0482(12)      | 0.071(2)        | -0.0240(10)     | 0.0055(10)      | -0.0389(12)     |
| C15  | 0.0242(7)       | 0.0192(7)       | 0.0257(7)       | -0.0075(6)      | -0.0049(6)      | -0.0029(6)      |
| C16  | 0.0330(9)       | 0.0280(8)       | 0.0474(10)      | -0.0111(7)      | 0.0090(8)       | -0.0136(8)      |
| C17  | 0.0284(9)       | 0.0460(10)      | 0.0419(10)      | -0.0204(8)      | 0.0063(8)       | -0.0039(8)      |

The general temperature factor expression:  $\exp(-2\pi^2(a^2U_{11}h^2 + b^2U_{22}k^2 + c^2U_{33}l^2 + 2a*b*U_{12}hk + 2a*c*U_{13}hl + 2b*c*U_{23}kl))$

**Table S4-5.** Bond lengths (Å)

| atom | atom | distance   | atom | atom             | distance   |
|------|------|------------|------|------------------|------------|
| Fe1  | O1   | 2.100(4)   | Fe1  | O1 <sup>1</sup>  | 2.100(4)   |
| Fe1  | O12  | 2.0820(18) | Fe1  | O12 <sup>1</sup> | 2.0820(18) |
| Fe1  | O13  | 2.094(4)   | Fe1  | O13 <sup>1</sup> | 2.094(4)   |
| Fe2  | Fe4  | 2.671(4)   | Fe2  | C1               | 1.9125(18) |
| Fe2  | C4   | 1.831(3)   | Fe3  | Fe4              | 2.6954(13) |
| Fe3  | C1   | 1.912(3)   | Fe3  | C7               | 1.832(3)   |
| Fe4  | C8   | 1.820(3)   | O1   | C1               | 1.200(3)   |
| O2   | C2   | 1.151(3)   | O3   | C3               | 1.149(2)   |
| O4   | C4   | 1.133(3)   | O5   | C5               | 1.145(3)   |
| O6   | C6   | 1.139(3)   | O7   | C7               | 1.143(3)   |
| O8   | C8   | 1.144(3)   | O9   | C9               | 1.142(3)   |
| O10  | C10  | 1.136(3)   | O11  | C11              | 1.150(3)   |
| O12  | C12  | 1.238(3)   | O13  | C15              | 1.236(3)   |
| N1   | C12  | 1.320(3)   | N1   | C13              | 1.448(3)   |
| N1   | C14  | 1.453(4)   | N2   | C15              | 1.316(3)   |
| N2   | C16  | 1.447(3)   | N2   | C17              | 1.454(3)   |

Symmetry Operators:

(1) -X+1,-Y+2,-Z

**Table S4-6.** Bond lengths involving hydrogens (Å)

| atom | atom | distance | atom | atom | distance |
|------|------|----------|------|------|----------|
| Fe2  | H1   | 1.61(3)  | Fe3  | H1   | 1.67(2)  |



**Table S4-7.** Bond angles ( $^{\circ}$ )

| atom             | atom | atom             | angle      | atom             | atom | atom             | angle      |
|------------------|------|------------------|------------|------------------|------|------------------|------------|
| O1               | Fe1  | O1 <sup>1</sup>  | 180.0(2)   | O1               | Fe1  | O12              | 91.84(10)  |
| O1               | Fe1  | O12 <sup>1</sup> | 88.16(10)  | O1               | Fe1  | O13              | 89.57(11)  |
| O1               | Fe1  | O13 <sup>1</sup> | 90.43(11)  | O1 <sup>1</sup>  | Fe1  | O12              | 88.16(10)  |
| O1 <sup>1</sup>  | Fe1  | O12 <sup>1</sup> | 91.84(10)  | O1 <sup>1</sup>  | Fe1  | O13              | 90.43(11)  |
| O1 <sup>1</sup>  | Fe1  | O13 <sup>1</sup> | 89.57(11)  | O12              | Fe1  | O12 <sup>1</sup> | 180.00(6)  |
| O12              | Fe1  | O13              | 88.09(9)   | O12              | Fe1  | O13 <sup>1</sup> | 91.91(9)   |
| O12 <sup>1</sup> | Fe1  | O13              | 91.91(9)   | O12 <sup>1</sup> | Fe1  | O13 <sup>1</sup> | 88.09(9)   |
| O13              | Fe1  | O13 <sup>1</sup> | 180.00(7)  | Fe4              | Fe2  | C1               | 76.01(14)  |
| Fe4              | Fe2  | C4               | 93.18(14)  | C1               | Fe2  | C4               | 165.23(7)  |
| Fe4              | Fe3  | C1               | 75.41(10)  | Fe4              | Fe3  | C7               | 101.43(11) |
| C1               | Fe3  | C7               | 167.39(8)  | Fe2              | Fe4  | Fe3              | 57.70(5)   |
| Fe2              | Fe4  | C8               | 90.63(13)  | Fe3              | Fe4  | C8               | 95.02(12)  |
| Fe1              | O1   | C1               | 176.06(15) | Fe1              | O12  | C12              | 128.31(13) |
| Fe1              | O13  | C15              | 126.30(12) | C12              | N1   | C13              | 120.45(17) |
| C12              | N1   | C14              | 121.66(17) | C13              | N1   | C14              | 117.8(3)   |
| C15              | N2   | C16              | 120.50(17) | C15              | N2   | C17              | 122.57(16) |
| C16              | N2   | C17              | 116.69(17) | Fe2              | C1   | Fe3              | 85.24(15)  |
| Fe2              | C1   | O1               | 136.61(15) | Fe3              | C1   | O1               | 137.93(17) |
| Fe2              | C4   | O4               | 176.35(18) | Fe3              | C7   | O7               | 174.35(19) |
| Fe4              | C8   | O8               | 174.75(15) | O12              | C12  | N1               | 123.11(16) |
| O13              | C15  | N2               | 124.42(17) |                  |      |                  |            |

Symmetry Operators:

(1)  $-X+1,-Y+2,-Z$

**Table S4-8.** Bond angles involving hydrogens ( $^{\circ}$ )

| atom | atom | atom | angle     | atom | atom | atom | angle   |
|------|------|------|-----------|------|------|------|---------|
| Fe4  | Fe2  | H1   | 81.4(7)   | C1   | Fe2  | H1   | 82.2(8) |
| C4   | Fe2  | H1   | 86.3(8)   | Fe4  | Fe3  | H1   | 79.8(9) |
| C1   | Fe3  | H1   | 80.9(7)   | C7   | Fe3  | H1   | 86.5(7) |
| Fe2  | H1   | Fe3  | 104.2(11) |      |      |      |         |

**Table S4-9.** Torsion Angles(<sup>o</sup>)

(Those having bond angles > 160 or < 20 degrees are excluded.)

| atom1            | atom2 | atom3            | atom4            | angle       | atom1            | atom2 | atom3            | atom4            | angle       |
|------------------|-------|------------------|------------------|-------------|------------------|-------|------------------|------------------|-------------|
| O1               | Fe1   | O12              | C12              | -91.68(14)  | O1               | Fe1   | O12 <sup>1</sup> | C12 <sup>1</sup> | -88.32(14)  |
| O1               | Fe1   | O13              | C15              | -55.56(14)  | O1               | Fe1   | O13 <sup>1</sup> | C15 <sup>1</sup> | -124.44(14) |
| O1 <sup>1</sup>  | Fe1   | O12              | C12              | 88.32(14)   | O1 <sup>1</sup>  | Fe1   | O12 <sup>1</sup> | C12 <sup>1</sup> | 91.68(14)   |
| O1 <sup>1</sup>  | Fe1   | O13              | C15              | 124.44(14)  | O1 <sup>1</sup>  | Fe1   | O13 <sup>1</sup> | C15 <sup>1</sup> | 55.56(14)   |
| O12              | Fe1   | O13              | C15              | -147.42(11) | O13              | Fe1   | O12              | C12              | -2.17(9)    |
| O12              | Fe1   | O13 <sup>1</sup> | C15 <sup>1</sup> | -32.58(11)  | O13 <sup>1</sup> | Fe1   | O12              | C12              | 177.83(9)   |
| O12 <sup>1</sup> | Fe1   | O13              | C15              | 32.58(11)   | O13              | Fe1   | O12 <sup>1</sup> | C12 <sup>1</sup> | -177.83(9)  |
| O12 <sup>1</sup> | Fe1   | O13 <sup>1</sup> | C15 <sup>1</sup> | 147.42(11)  | O13 <sup>1</sup> | Fe1   | O12 <sup>1</sup> | C12 <sup>1</sup> | 2.17(9)     |
| Fe4              | Fe2   | C1               | Fe3              | 64.11(9)    | Fe4              | Fe2   | C1               | O1               | -120.81(18) |
| C1               | Fe2   | Fe4              | Fe3              | -48.79(10)  | C1               | Fe2   | Fe4              | C8               | 46.74(8)    |
| C4               | Fe2   | Fe4              | Fe3              | 121.00(11)  | C4               | Fe2   | Fe4              | C8               | -143.46(9)  |
| Fe4              | Fe3   | C1               | Fe2              | -63.38(12)  | Fe4              | Fe3   | C1               | O1               | 121.66(19)  |
| C1               | Fe3   | Fe4              | Fe2              | 48.99(8)    | C1               | Fe3   | Fe4              | C8               | -38.58(11)  |
| C7               | Fe3   | Fe4              | Fe2              | -118.47(8)  | C7               | Fe3   | Fe4              | C8               | 153.96(9)   |
| Fe1              | O12   | C12              | N1               | 177.01(8)   | Fe1              | O13   | C15              | N2               | -179.66(10) |
| C13              | N1    | C12              | O12              | -1.0(3)     | C14              | N1    | C12              | O12              | -176.92(15) |
| C16              | N2    | C15              | O13              | -1.2(3)     | C17              | N2    | C15              | O13              | -175.34(17) |

Symmetry Operators:

(1) -X+1,-Y+2,-Z

## S-5. Spectral Data of Amines

### *N,N*-Dimethyl-(*p*-methoxybenzyl)amine (2a)

IR (neat):  $\nu = 2941, 2813, 2768, 1613, 1511, 1456, 1300, 1177, 1038, 854, 810 \text{ cm}^{-1}$ ;  $^1\text{H NMR}$  (400 MHz,  $\text{CDCl}_3$ ):  $\delta = 2.22$  (s, 6H), 3.34 (s, 2H), 3.80 (s, 3H), 6.86 (d,  $J = 8.8 \text{ Hz}$ , 2H), 7.22 (d,  $J = 8.8 \text{ Hz}$ , 2H);  $^{13}\text{C NMR}$  (100 MHz,  $\text{CDCl}_3$ ):  $\delta = 45.0, 55.1, 63.6, 113.5, 130.1, 130.7, 158.6$ .

### *N,N*-Dimethylbenzylamine (2b)

IR (neat)  $\nu$  2964, 2925, 1260, 1093, 1021  $800 \text{ cm}^{-1}$ ;  $^1\text{H NMR}$  (600 MHz,  $\text{CDCl}_3$ )  $\delta$ : 2.18 (s, 6H), 3.38 (s, 2H), 7.17-7.34 (m, 3H), 7.42-7.45 (m, 2H).  $^{13}\text{C NMR}$  (150 MHz,  $\text{CDCl}_3$ )  $\delta$ : 45.4, 64.4, 127.0, 128.2, 129.1, 138.9.

### *N,N*-Dimethyl-(*p*-chlorobenzyl)amine (2c)

IR (neat):  $\nu = 2973, 2945, 2854, 2815, 2769, 1499, 1460, 1369, 1262, 1093, 1030, 861, 811 \text{ cm}^{-1}$ .  $^1\text{H NMR}$  (400 MHz,  $\text{CDCl}_3$ ):  $\delta = 2.22$  (s, 6H), 3.38 (s, 2H), 7.22 (d,  $J = 8.2 \text{ Hz}$ , 2H), 7.26 (d,  $J = 8.2 \text{ Hz}$ , 2H).  $^{13}\text{C NMR}$  (100 MHz,  $\text{CDCl}_3$ ):  $\delta = 45.2, 63.5, 128.3, 130.3, 132.7, 137.3$ .

### *N,N*-Dimethyl-(*p*-bromobenzyl)amine (2d)

IR (neat):  $\nu = 2941, 2815, 1487, 1361, 1259, 1173, 1070, 1011, 856, 796 \text{ cm}^{-1}$ ;  $^1\text{H NMR}$  (400 MHz,  $\text{CDCl}_3$ ):  $\delta = 2.22$  (s, 6H), 3.36 (s, 2H), 7.18 (d,  $J = 8.4 \text{ Hz}$ , 2H), 7.44 (d,  $J = 8.4 \text{ Hz}$ , 2H);  $^{13}\text{C NMR}$  (100 MHz,  $\text{CDCl}_3$ ):  $\delta = 45.4, 63.7, 120.9, 130.7, 131.4, 138.1$ .

### *N,N*-Dimethyl-(*p*-methoxycarbonyl)amine (2e)

IR (neat):  $\nu = 2948, 2816, 2769, 1726, 1611, 1435, 1414, 1361, 1280, 1173, 1146, 1110, 1019, 968, 865, 757, 700 \text{ cm}^{-1}$ ;  $^1\text{H NMR}$  (400 MHz,  $\text{CDCl}_3$ ):  $\delta = 2.21$  (s, 6H), 3.46 (s, 2H), 3.91 (s, 3H), 7.38 (d,  $J = 8.2 \text{ Hz}$ , 2H), 8.00 (d,  $J = 8.2 \text{ Hz}$ , 2H);  $^{13}\text{C NMR}$  (100 MHz,  $\text{CDCl}_3$ ):  $\delta = 45.4, 51.9, 63.9, 128.8, 128.9, 129.5, 144.3, 166.9$ .

### *N,N*-Dimethyl-3-phenylpropylamine (2f)

IR (neat):  $\nu = 3062, 3026, 2942, 2764, 1603, 1496, 1454, 1265, 1030 \text{ cm}^{-1}$ ;  $^1\text{H NMR}$  (400 MHz,  $\text{CDCl}_3$ ):  $\delta = 1.80$  (tt,  $J = 8.2, 7.7 \text{ Hz}$ , 2H), 2.23 (s, 6H), 2.30 (t,  $J = 7.7 \text{ Hz}$ , 2H), 2.63 (t,  $J = 8.2 \text{ Hz}$ , 2H), 7.15–7.23 (m, 3H), 7.25–7.32 (m, 2H);  $^{13}\text{C NMR}$  (100 MHz,  $\text{CDCl}_3$ ):  $\delta = 29.5, 33.6, 45.5, 59.3, 125.7, 128.3, 128.4, 142.3$ .

### *N,N*-Dimethyl-cyclohexylmethylamine (2g)

IR (neat):  $\nu = 2922, 2851, 2761, 1455, 1264, 1032, 852, 832 \text{ cm}^{-1}$ .  $^1\text{H NMR}$  (400 MHz,  $\text{CDCl}_3$ ):  $\delta = 0.87$  (m, 2H), 1.10–1.31 (m, 3H), 1.43 (m, 1H), 1.60–1.84 (m, 5H), 2.04 (d,  $J = 7.2 \text{ Hz}$ , 2H), 2.18 (d,  $J = 7.3 \text{ Hz}$ , 6H);  $^{13}\text{C NMR}$  (100 MHz,  $\text{CDCl}_3$ ):  $\delta = 26.1, 26.8, 31.8, 35.8, 46.0, 67.2$ .

### 1-Benzylazepane (2h)

IR (neat):  $\nu = 2925, 2852, 1453, 1354, 1153, 1071, 961, 745, 697 \text{ cm}^{-1}$ ;  $^1\text{H NMR}$  (400 MHz,  $\text{CDCl}_3$ ):  $\delta =$

1.53–1.73 (m, 8H), 2.51–2.68 (m, 4H), 3.64 (s, 2H), 7.19–7.38 (m, 5H);  $^{13}\text{C}$  NMR (100 MHz,  $\text{CDCl}_3$ ):  $\delta$  = 27.1, 28.3, 55.7, 62.8, 126.7, 128.1, 128.88, 140.2.

**4-[[4-(chloromethyl)phenyl]methyl]-morpholine (2i)**

IR (neat):  $\nu$  = 2959, 2854, 2806, 1454, 1349, 1266, 1117, 1008, 867, 729, 676, 517  $\text{cm}^{-1}$ ;  $^1\text{H}$  NMR (400 MHz,  $\text{CDCl}_3$ ):  $\delta$  = 2.44 (t,  $J$  = 4.3 Hz, 4H), 3.50 (s, 2H), 3.71 (t,  $J$  = 4.3 Hz, 4H), 4.58 (s, 2H), 7.28–7.41 (m, 4H);  $^{13}\text{C}$  NMR (100 MHz,  $\text{CDCl}_3$ ):  $\delta$  = 46.5, 54.1, 63.5, 67.4, 129.0, 130.0, 136.9, 138.6. HRMS (EI) calcd for  $\text{C}_{12}\text{H}_{16}\text{ClNO}$  225.0920, found 225.0926

***N*-Methylbenzylamine (2j)**

IR (neat):  $\nu$  = 3321, 3284, 3084, 3062, 2968, 2932, 2843, 2788, 1603, 1494, 1473, 1453, 1356, 1128, 1104, 1073, 1028, 824, 735, 698  $\text{cm}^{-1}$ ;  $^1\text{H}$  NMR (600 MHz,  $\text{CDCl}_3$ )  $\delta$ : 2.40 (s, 3H), 3.70 (s, 2H), 7.16–7.34 (m, 5H).  $^{13}\text{C}$  NMR (150 MHz,  $\text{CDCl}_3$ )  $\delta$ : 36.5, 61.0, 127.4, 128.7, 128.9, 140.5.

### S-6. Copies of the actual NMR spectrum

$^1\text{H}$  NMR spectra of **2a** ( $\text{CDCl}_3$ )

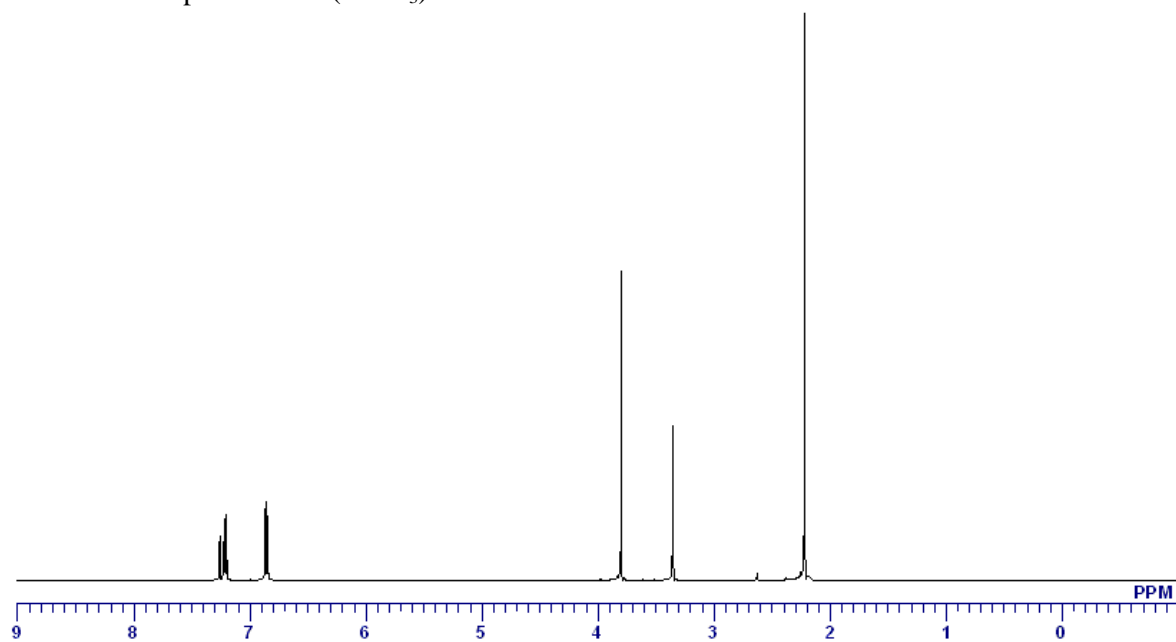

$^1\text{H}$  NMR spectra of **2b** ( $\text{CDCl}_3$ )

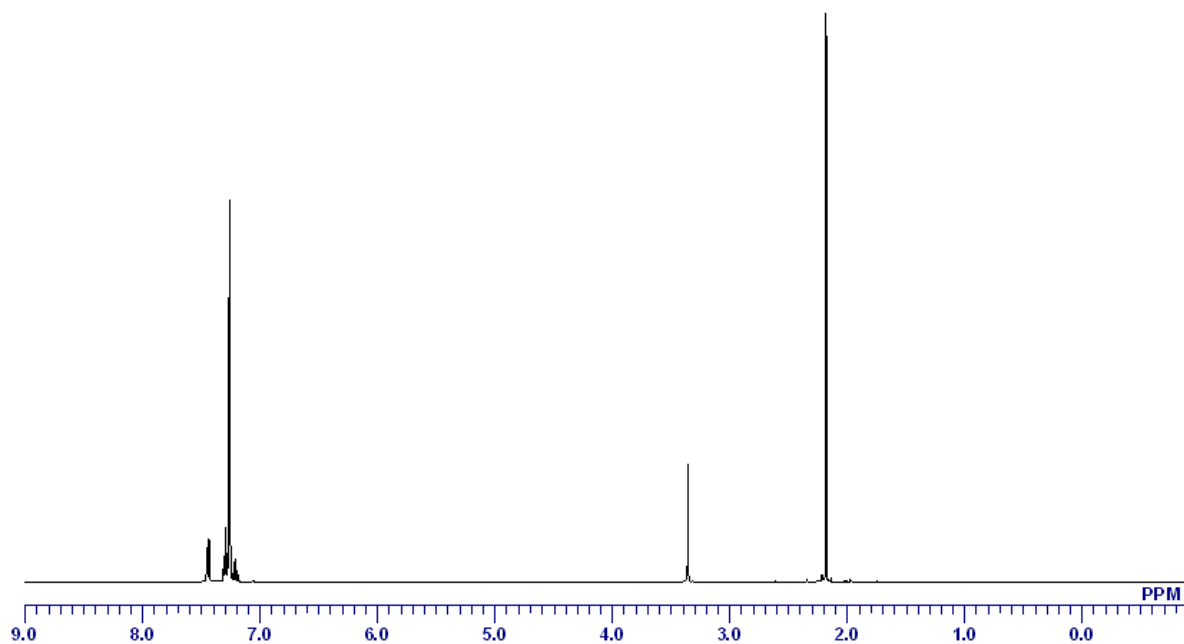

$^1\text{H}$  NMR spectra of **2c** ( $\text{CDCl}_3$ )

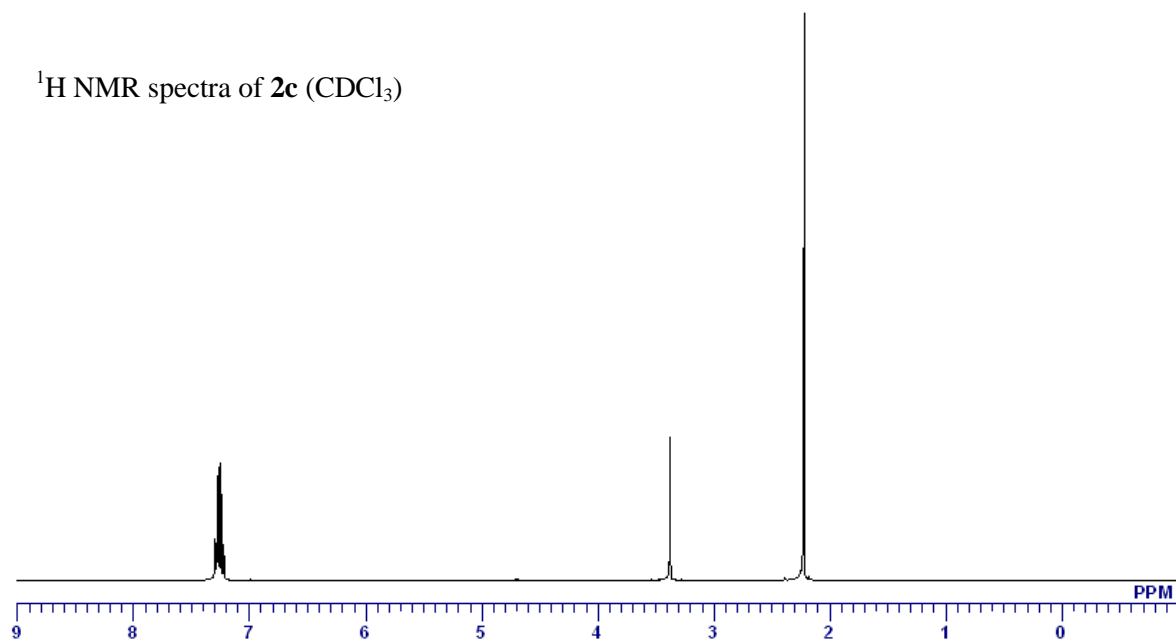

$^1\text{H}$  NMR spectra of **2d** ( $\text{CDCl}_3$ )

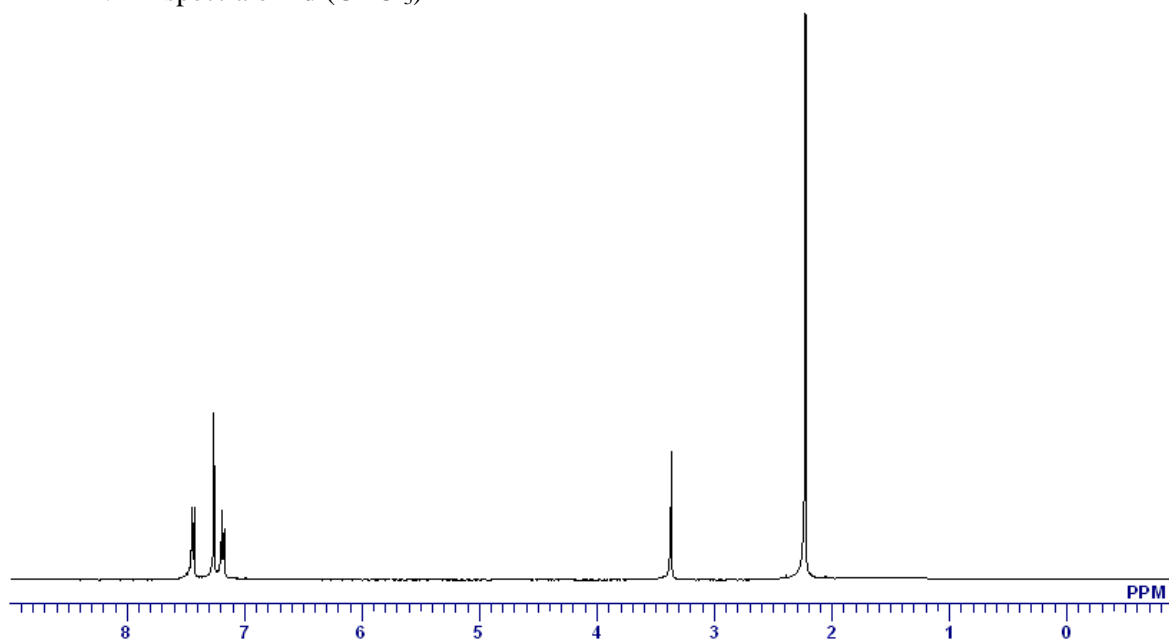

$^1\text{H}$  NMR spectra of **2e** ( $\text{CDCl}_3$ )

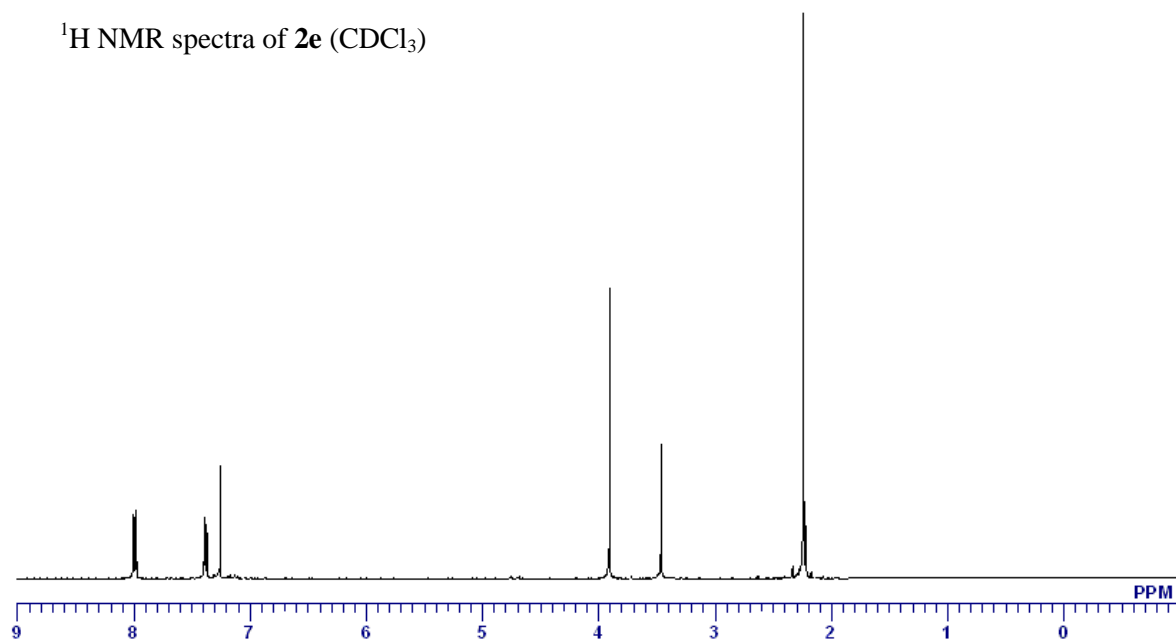

$^1\text{H}$  NMR spectra of **2f** ( $\text{CDCl}_3$ )

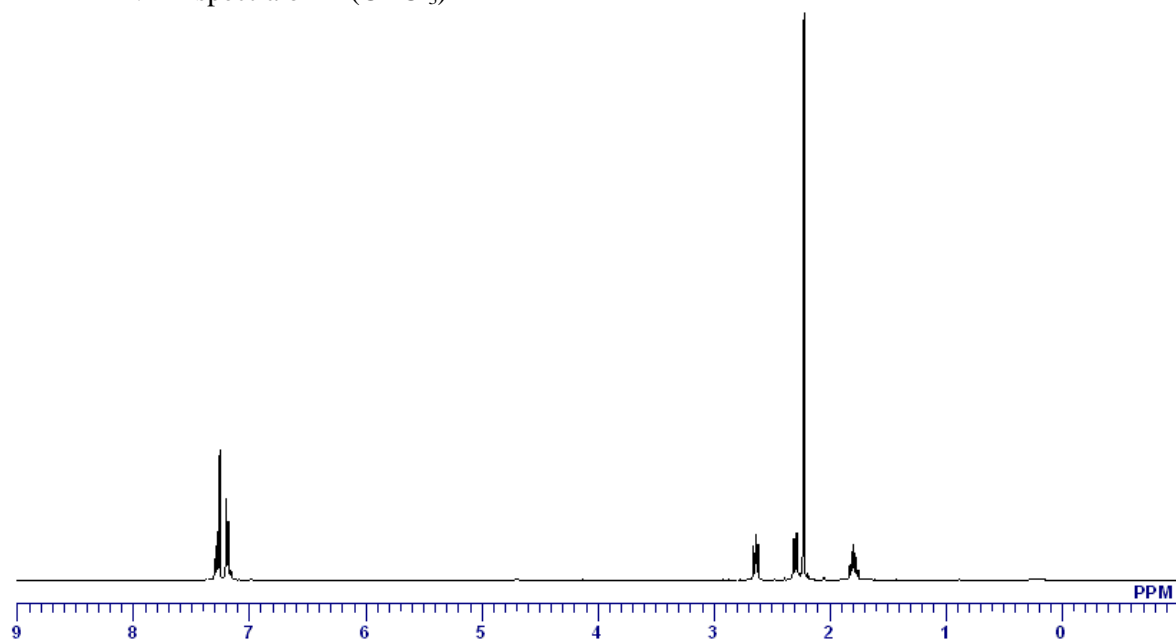

$^1\text{H}$  NMR spectra of **2g** ( $\text{CDCl}_3$ )

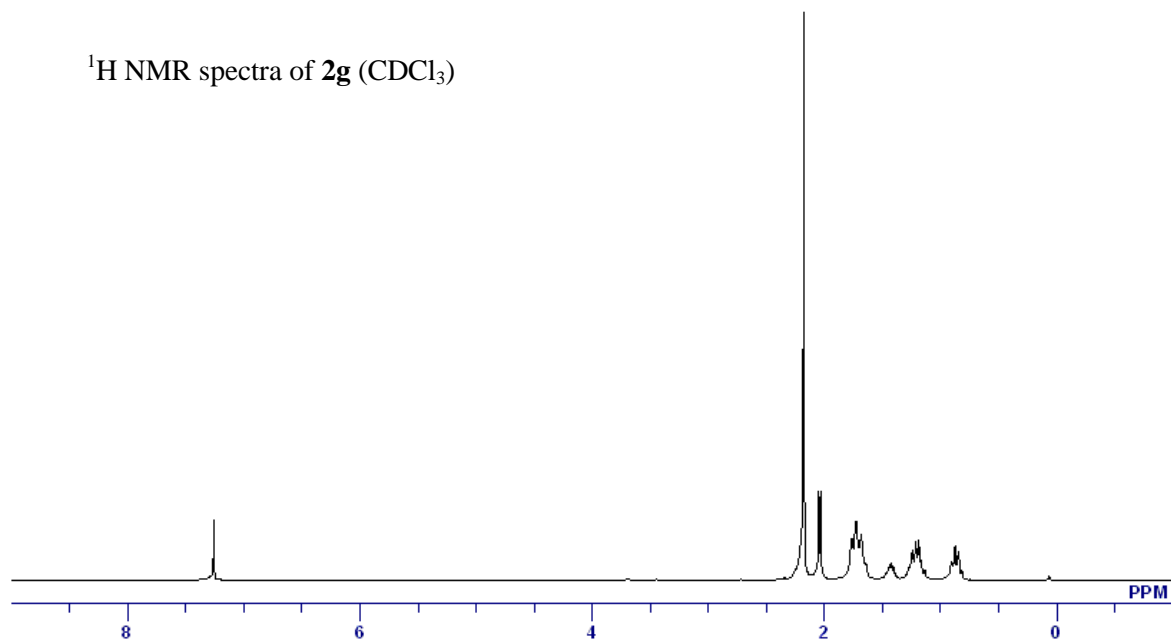

$^1\text{H}$  NMR spectra of **2h** ( $\text{CDCl}_3$ )

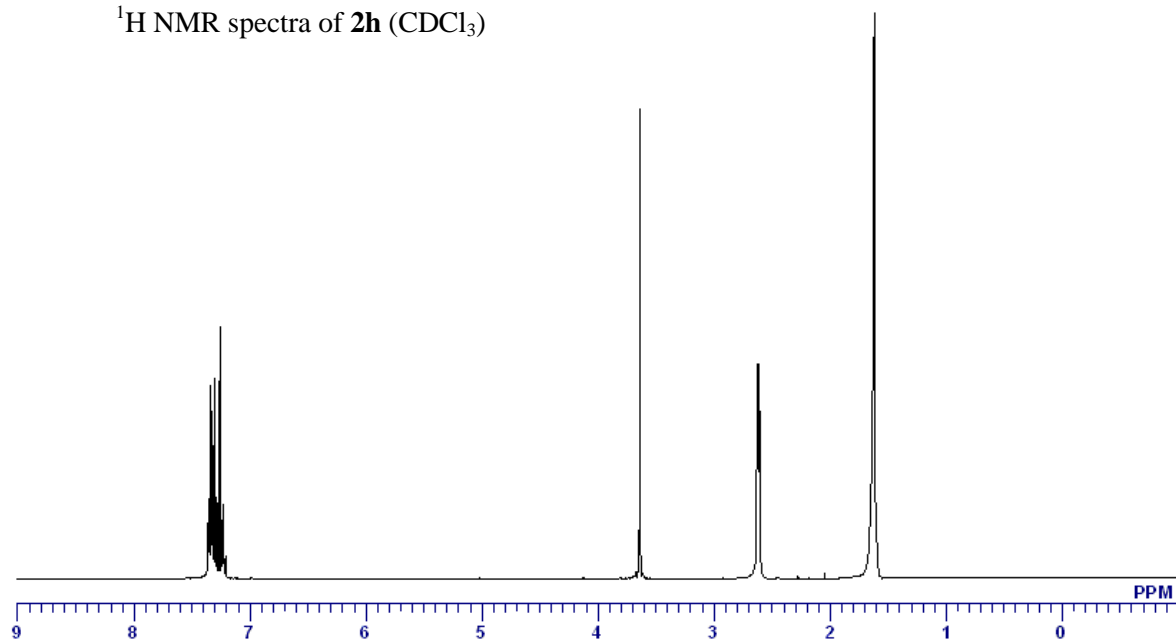



$^1\text{H}$  NMR spectra of **2i** ( $\text{CDCl}_3$ )

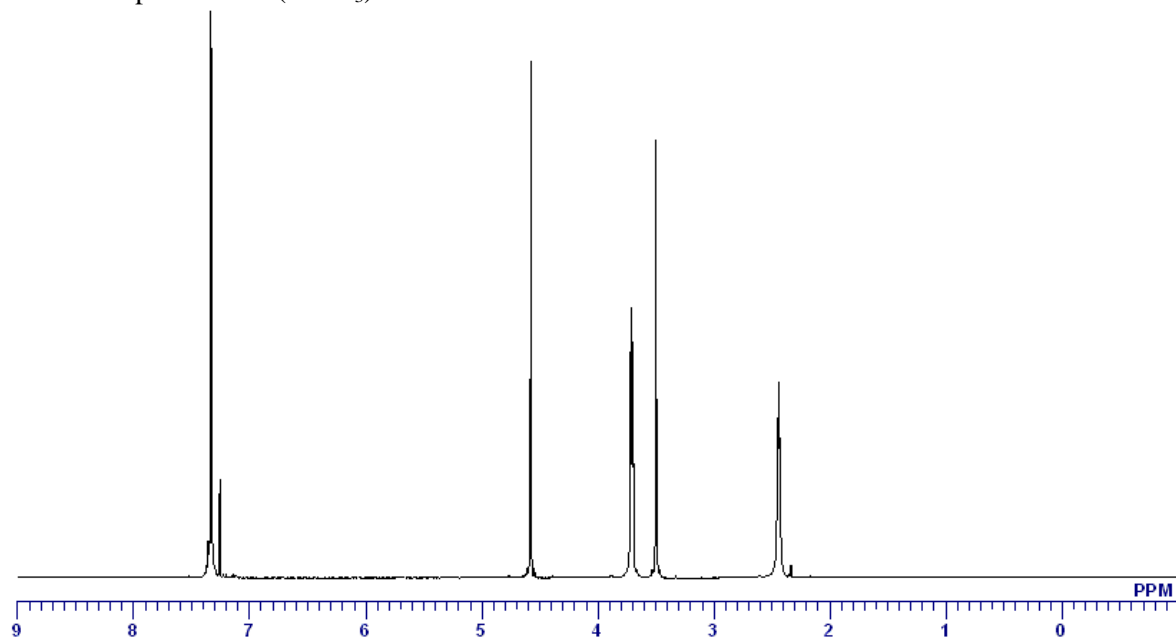

$^1\text{H}$  NMR spectra of **2j** ( $\text{CDCl}_3$ )

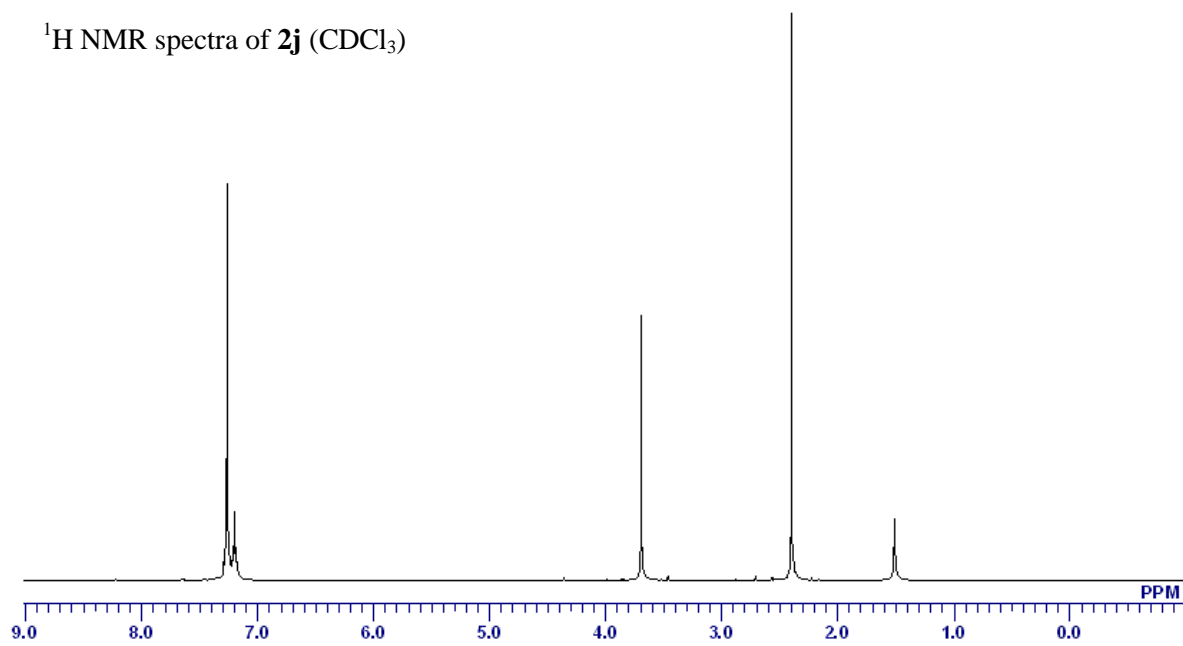

## S-7. References

1. H. Nagashima, K. Tatebe, I. Ishibashi, A. Nakaoka, J. Sakakibara, K. Itoh, *Organometallics* **1995**, *14*, 2868.
2. (a) W. Fink, *Helv. Chem. Acta.* **1975**, *58*, 1464. (b) W. Fink, *Helv. Chem. Acta.* **1976**, *59*, 606.
3. (a) Y. Sunada, H. Kawakami, T. Imaoka, T. Y. Motoyama, H. Nagashima, *Angew. Chem. Int. Ed.*, **2009**, *48*, 9511. (b) S. Hanada, Y. Motoyama, H. Nagashima, *Tetrahedron Lett.* **2006**, *47*, 6173. (c) S. Hanada, E. Tsutsumi, Y. Motoyama, H. Nagashima, *J. Am. Chem. Soc.* **2009**, *131*, 15032.
4. (a) SHELX97: Sheldrick, G. M. **1997**. (b) SIR97: Altomare, A.; Burla, M. C.; Camalli, M.; Casciarano, G.; Guagliardi, A.; Moliterni, A.; Polidori, G.; Spagna, R. **1999**.
5. DIRDIF99: Beurskens, P. T.; Admiraal, G.; Beurskens, G.; Bosman, W. P.; de Gelder, R.; Israel, R.; Smits, J. M. The DIRDIF-99 program system; *Technical Report of the Crystallography Laboratory*; University of Nijmegen, Nijmegen, The Netherlands, **1999**.
6. Cromer, D. T.; Waber, J. T. *International Tables for X-ray Crystallography*; Kynoch Press: Birmingham, U.K., **1974** Vol. 4.
7. CrystalStructure 3.8.0: Crystal Structure Analysis Package; Package, Rigaku and Rigaku/MS. 9009 New Trails Dr. The Woodlands TX 77381 USA. **2000-2006**.
8. CRYSTALS Issue 11: Carruthers, J. R.; Rollett, J. S.; Betteridge, P. W.; Kinna, D.; Pearce, L.; Larsen, A.; Gabe, E. *Chemical Crystallography Laboratory*; Oxford, U.K., **1999**.
